# Supplementary material for: Identification and Characterization of the Direct Interaction between Methotrexate (MTX) and High-Mobility Group Box 1 (HMGB1) Protein
Source: PubMed Central journal article supplement (PMC3643934; doi:10.1371/journal.pone.0063073), 2013-05-03

Figure S2

A

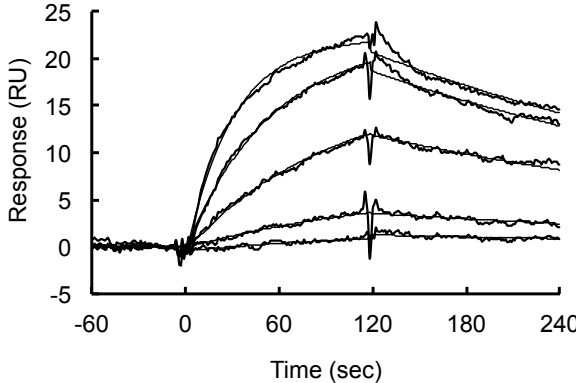

B

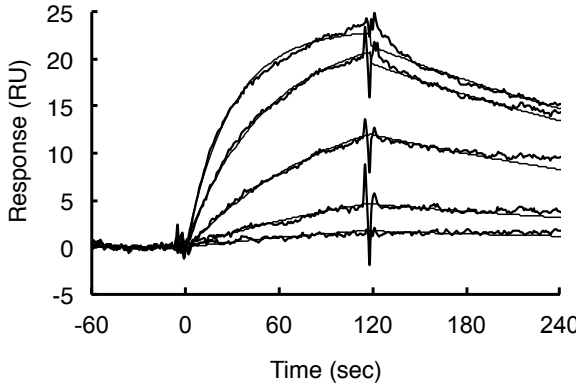

C

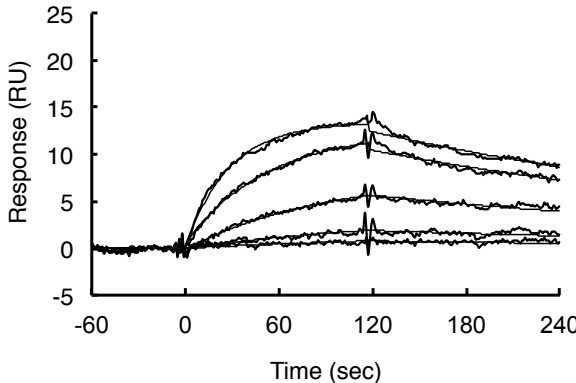

Supplement: pone.0063073.s002.pdf [file pone.0063073.s002.pdf]
