# Supplementary material for: Identification and Characterization of the Direct Interaction between Methotrexate (MTX) and High-Mobility Group Box 1 (HMGB1) Protein
Source: PubMed Central journal article supplement (PMC3643934; doi:10.1371/journal.pone.0063073), 2013-05-03

**Figure S5**

**A**

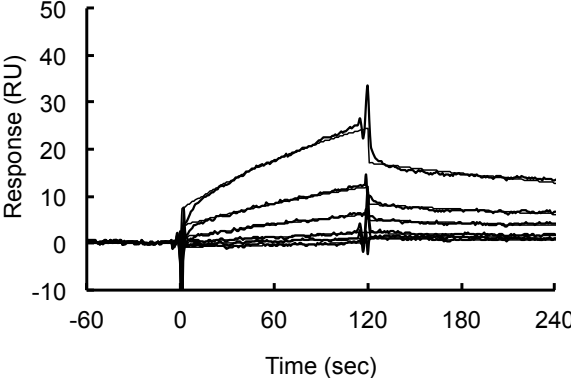

**B**

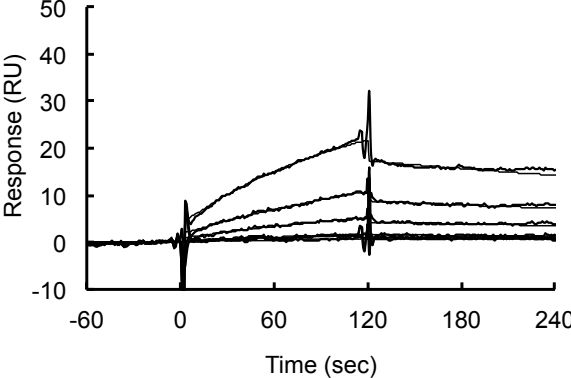

**C**

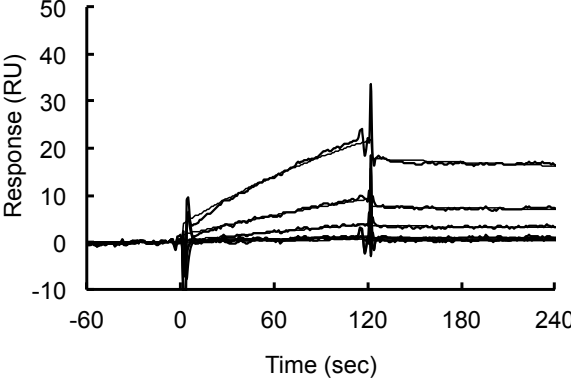

Supplement: pone.0063073.s005.pdf [file pone.0063073.s005.pdf]
