# Supplementary material for: Identification and Characterization of the Direct Interaction between Methotrexate (MTX) and High-Mobility Group Box 1 (HMGB1) Protein
Source: PubMed Central journal article supplement (PMC3643934; doi:10.1371/journal.pone.0063073), 2013-05-03
Supplement: pone.0063073.s007.pdf [file pone.0063073.s007.pdf]

**Table S2**

| Entry | $k_a$ ( $\times 10^3$ M <sup>-1</sup> s <sup>-1</sup> ) | $k_d$ ( $\times 10^{-3}$ s <sup>-1</sup> ) | $K_D(k_d/k_a)$ ( $\mu$ M) | $R_{\max}$ (RU) | $\chi^2$ |
|-------|---------------------------------------------------------|--------------------------------------------|---------------------------|-----------------|----------|
| A     | 12.1                                                    | 3.10                                       | 0.26                      | 18.5            | 0.118    |
| B     | 12.6                                                    | 3.07                                       | 0.24                      | 19.6            | 0.093    |
| C     | 13.0                                                    | 3.02                                       | 0.23                      | 9.7             | 0.071    |
