# Supplementary material for: Identification and Characterization of the Direct Interaction between Methotrexate (MTX) and High-Mobility Group Box 1 (HMGB1) Protein
Source: PubMed Central journal article supplement (PMC3643934; doi:10.1371/journal.pone.0063073), 2013-05-03
Supplement: pone.0063073.s008.pdf [file pone.0063073.s008.pdf]

**Table S3**

| Conc. of AlBj ( $\mu\text{M}$ ) | $R_{\text{eq}}$ (RU)   |                        | Average |
|---------------------------------|------------------------|------------------------|---------|
|                                 | A ( $\chi^2 = 0.306$ ) | B ( $\chi^2 = 0.215$ ) |         |
| 0.625                           | 46.3                   | 39.5                   | 42.9    |
| 1.25                            | 54.8                   | 44.3                   | 49.6    |
| 2.5                             | 64.5                   | 47.1                   | 55.8    |
| 5                               | 75.2                   | 50.3                   | 62.8    |
| 10                              | 76.8                   | 55.1                   | 66.0    |

$R_{\text{eq}}$ : Response at equilibrium between immobilized bio-MTX and AlBj protein
